# Supplementary material for: Effects of Pollen Sources on Fruit Set and Fruit Characteristics of ‘Fengtangli’ Plum (Prunus salicina Lindl.) Based on Microscopic and Transcriptomic Analysis
Source: MDPI journal article supplement (doi:10.3390/ijms232112959), 2022-10-26
Supplement: s1 [file s1]

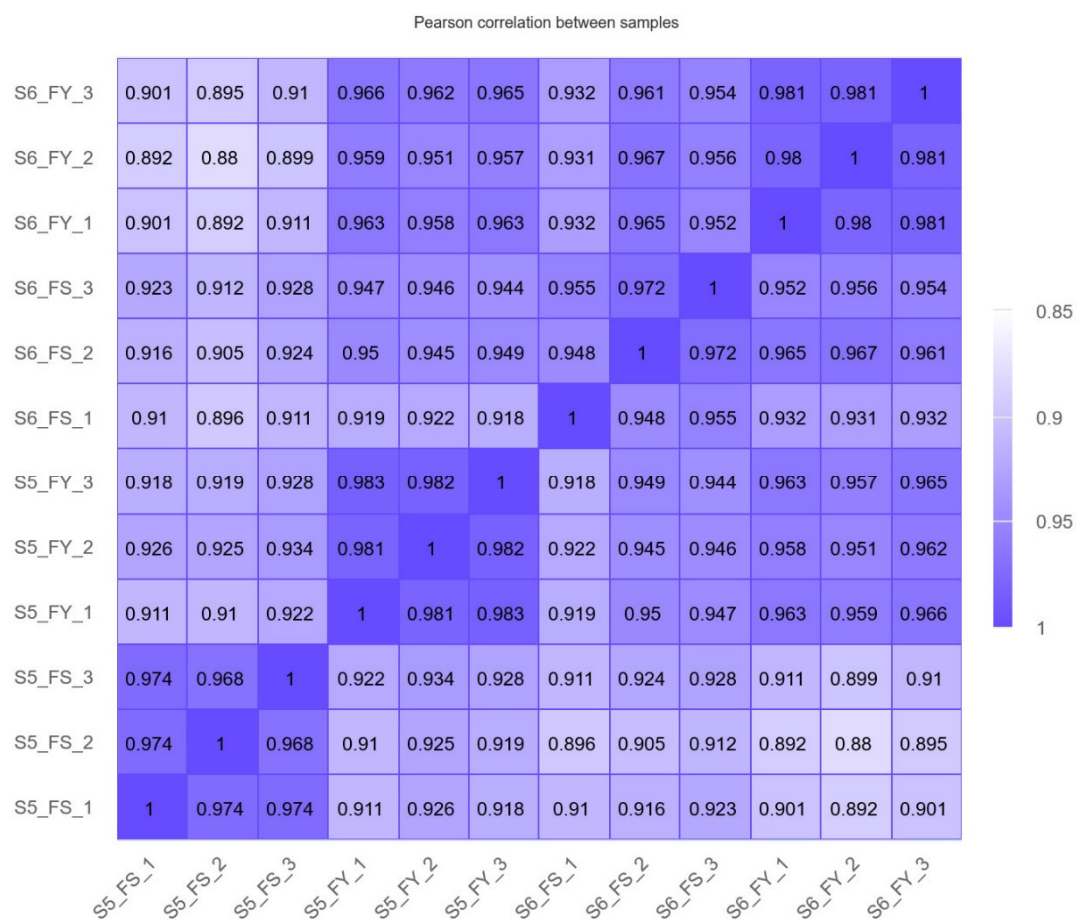

Figure S1. Pearson's correlation matrix between different samples.

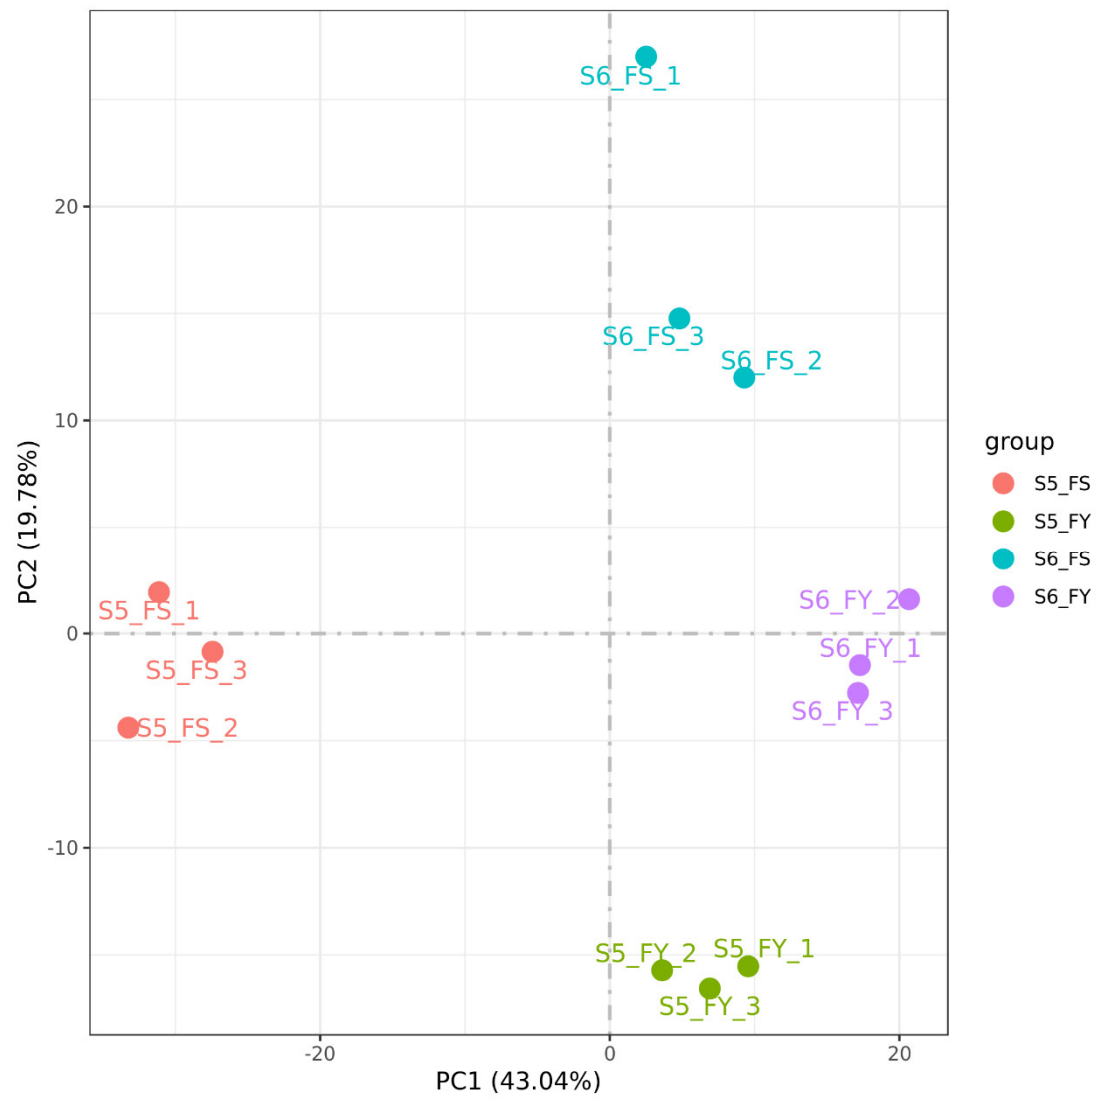

Figure S2. The result of principal component analysis (PCA) of all samples.
