# Supplementary material for: Effects of Pollen Sources on Fruit Set and Fruit Characteristics of ‘Fengtangli’ Plum (Prunus salicina Lindl.) Based on Microscopic and Transcriptomic Analysis
Source: Int J Mol Sci. 2022 Oct 26;23(21):12959. doi: 10.3390/ijms232112959 (PMC9656660; doi:10.3390/ijms232112959)
Supplement: Supplementary file 1 [file ijms-23-12959-s001.zip › Supplementary Files/Supplementary Tables.xlsx]

## Sheet: Table S1
Table S1. Overview of the transcriptome sequencing dataset.
sample	raw reads	raw bases	clean reads	clean bases	error rate	Q20	Q30	GC_pct	proper map	total map
S5_FS_1	47035708	7.06G	42520762	6.38G	0.03	97.67	93.4	46.04	34389114(80.88%)	39795115(93.59%)
S5_FS_2	43081044	6.46G	40539624	6.08G	0.03	97.27	92.66	46.19	33490460(82.61%)	37937639(93.58%)
S5_FS_3	45721766	6.86G	43048398	6.46G	0.03	97.57	93.28	46.06	35631674(82.77%)	40313536(93.65%)
S5_FY_1	46223956	6.93G	43065496	6.46G	0.03	97.44	92.94	46.22	35154876(81.63%)	40077532(93.06%)
S5_FY_2	41886844	6.28G	38305886	5.75G	0.03	97.57	93.1	46.21	31434522(82.06%)	35733409(93.28%)
S5_FY_3	41084060	6.16G	38623558	5.79G	0.03	97.38	92.76	46.09	31283672(81.0%)	35765064(92.60%)
S6_FS_1	46342466	6.95G	42455424	6.37G	0.02	98.05	94.15	45.41	34719568(81.78%)	39844042(93.85%)
S6_FS_2	45389302	6.81G	42124224	6.32G	0.03	97.48	93	46.08	34430032(81.73%)	39504020(93.78%)
S6_FS_3	45558740	6.83G	42403988	6.36G	0.03	97.5	93.03	46.11	35090418(82.75%)	39987354(94.30%)
S6_FY_1	45236520	6.79G	42362670	6.35G	0.03	97.63	93.28	45.95	34589854(81.65%)	39301852(92.77%)
S6_FY_2	41185454	6.18G	37854004	5.68G	0.03	97.71	93.55	45.96	31022512(81.95%)	35291855(93.23%)
S6_FY_3	45301806	6.8G	41872832	6.28G	0.03	97.93	94.03	45.96	34255090(81.81%)	39060718(93.28%)

## Sheet: Table S2
Table S2. GO enrichment analysis of S5_FS vs S5_FY comparison.
Ontoloty	GO ID	GO term	Number of Genes	Gene members
biological process	GO:0051704	multi-organism process	17	evm.TU.Chr4.1810/evm.TU.Chr1.2475/novel.1070/novel.2129/novel.1069/novel.1068/evm.TU.Chr3.2313/novel.1244/evm.TU.Chr4.1823/evm.TU.Chr3.1351/novel.2019/novel.1461/novel.1683/novel.1952/novel.2143/evm.TU.Chr4.300/evm.TU.Chr4.1821
biological process	GO:0008037	cell recognition	15	evm.TU.Chr4.1810/evm.TU.Chr1.2475/novel.1070/novel.1069/novel.1068/evm.TU.Chr3.2313/novel.1244/evm.TU.Chr4.1823/evm.TU.Chr3.1351/novel.1461/novel.1683/novel.1952/novel.2143/evm.TU.Chr4.300/evm.TU.Chr4.1821
biological process	GO:0009856	pollination	15	evm.TU.Chr4.1810/evm.TU.Chr1.2475/novel.1070/novel.1069/novel.1068/evm.TU.Chr3.2313/novel.1244/evm.TU.Chr4.1823/evm.TU.Chr3.1351/novel.1461/novel.1683/novel.1952/novel.2143/evm.TU.Chr4.300/evm.TU.Chr4.1821
biological process	GO:0009875	pollen-pistil interaction	15	evm.TU.Chr4.1810/evm.TU.Chr1.2475/novel.1070/novel.1069/novel.1068/evm.TU.Chr3.2313/novel.1244/evm.TU.Chr4.1823/evm.TU.Chr3.1351/novel.1461/novel.1683/novel.1952/novel.2143/evm.TU.Chr4.300/evm.TU.Chr4.1821
biological process	GO:0044706	multi-multicellular organism process	15	evm.TU.Chr4.1810/evm.TU.Chr1.2475/novel.1070/novel.1069/novel.1068/evm.TU.Chr3.2313/novel.1244/evm.TU.Chr4.1823/evm.TU.Chr3.1351/novel.1461/novel.1683/novel.1952/novel.2143/evm.TU.Chr4.300/evm.TU.Chr4.1821
biological process	GO:0048544	recognition of pollen	15	evm.TU.Chr4.1810/evm.TU.Chr1.2475/novel.1070/novel.1069/novel.1068/evm.TU.Chr3.2313/novel.1244/evm.TU.Chr4.1823/evm.TU.Chr3.1351/novel.1461/novel.1683/novel.1952/novel.2143/evm.TU.Chr4.300/evm.TU.Chr4.1821
biological process	GO:0000003	reproduction	15	evm.TU.Chr4.1810/evm.TU.Chr1.2475/novel.1070/novel.1069/novel.1068/evm.TU.Chr3.2313/novel.1244/evm.TU.Chr4.1823/evm.TU.Chr3.1351/novel.1461/novel.1683/novel.1952/novel.2143/evm.TU.Chr4.300/evm.TU.Chr4.1821
biological process	GO:0022414	reproductive process	15	evm.TU.Chr4.1810/evm.TU.Chr1.2475/novel.1070/novel.1069/novel.1068/evm.TU.Chr3.2313/novel.1244/evm.TU.Chr4.1823/evm.TU.Chr3.1351/novel.1461/novel.1683/novel.1952/novel.2143/evm.TU.Chr4.300/evm.TU.Chr4.1821
biological process	GO:0000160	phosphorelay signal transduction system	13	evm.TU.Chr1.5574/evm.TU.Chr2.2009/evm.TU.Chr2.217/evm.TU.Chr6.3585/evm.TU.Chr1.925/evm.TU.Chr1.4744/evm.TU.Chr8.2158/evm.TU.Chr7.663/evm.TU.Chr1.3202/evm.TU.Chr5.2164/evm.TU.Chr2.225/evm.TU.Chr5.677/evm.TU.Chr1.1926
biological process	GO:0016567	protein ubiquitination	16	evm.TU.Chr7.1899/evm.TU.Chr4.628/evm.TU.Chr8.315/evm.TU.Chr5.725/evm.TU.Chr1.3544/evm.TU.Chr1.3269/evm.TU.Chr7.2598/evm.TU.Chr6.3657/evm.TU.Chr5.123/evm.TU.Chr3.1736/evm.TU.Chr1.2472/evm.TU.Chr4.2702/evm.TU.Chr1.3736/evm.TU.Chr1.2606/evm.TU.Chr7.1262/evm.TU.Chr6.1646
biological process	GO:0006820	anion transport	19	evm.TU.Chr5.755/evm.TU.Chr2.886/evm.TU.Chr3.761/evm.TU.Chr1.4911/evm.TU.Chr3.50/evm.TU.Chr7.2840/evm.TU.Chr8.1543/evm.TU.Chr2.3081/evm.TU.Chr3.707/evm.TU.Chr6.1472/evm.TU.Chr8.605/evm.TU.Chr4.837/evm.TU.Chr5.1166/evm.TU.Chr1.768/evm.TU.Chr5.838/evm.TU.Chr4.2759/evm.TU.Chr8.1769/evm.TU.Chr1.364/novel.1077
biological process	GO:0009308	amine metabolic process	9	evm.TU.Chr5.1775/evm.TU.Chr2.331/evm.TU.Chr1.1805/evm.TU.Chr1.2843/evm.TU.Chr1.3390/evm.TU.Chr5.817/evm.TU.Chr3.2487/evm.TU.Chr3.1522/evm.TU.Chr1.5778
biological process	GO:0009733	response to auxin	10	evm.TU.Chr7.2286/evm.TU.Chr4.1271/evm.TU.Chr3.334/novel.2875/evm.TU.Chr2.1498/evm.TU.Chr7.2017/evm.TU.Chr2.1975/evm.TU.Chr2.3093/evm.TU.Chr3.335/evm.TU.Chr7.2288
biological process	GO:0032446	protein modification by small protein conjugation	16	evm.TU.Chr7.1899/evm.TU.Chr4.628/evm.TU.Chr8.315/evm.TU.Chr5.725/evm.TU.Chr1.3544/evm.TU.Chr1.3269/evm.TU.Chr7.2598/evm.TU.Chr6.3657/evm.TU.Chr5.123/evm.TU.Chr3.1736/evm.TU.Chr1.2472/evm.TU.Chr4.2702/evm.TU.Chr1.3736/evm.TU.Chr1.2606/evm.TU.Chr7.1262/evm.TU.Chr6.1646
biological process	GO:0044262	cellular carbohydrate metabolic process	27	evm.TU.Chr1.3252/evm.TU.Chr1.5101/evm.TU.Chr8.2782/evm.TU.Chr5.720/novel.1786/evm.TU.Chr1.2486/evm.TU.Chr4.1806/evm.TU.Chr5.1193/evm.TU.Chr1.5262/evm.TU.Chr4.255_evm.TU.Chr4.256/evm.TU.Chr1.5104/novel.1260/evm.TU.Chr1.747/evm.TU.Chr7.2283/novel.1999/evm.TU.Chr5.2329/evm.TU.Chr4.1807/evm.TU.Chr7.2512/evm.TU.Chr3.2286/evm.TU.Chr1.5055/novel.2444/novel.1094/novel.1259/evm.TU.Chr3.2541/evm.TU.Chr5.99…
biological process	GO:0006952	defense response	15	novel.2129/evm.TU.Chr1.4724/evm.TU.Chr2.2429/evm.TU.Chr4.504/novel.59/novel.60/evm.TU.Chr6.935/evm.TU.Chr1.4733/evm.TU.Chr1.4734/novel.315/novel.2019/evm.TU.Chr2.2449/evm.TU.Chr2.1209/evm.TU.Chr1.4736/evm.TU.Chr1.4723
biological process	GO:0042221	response to chemical	22	evm.TU.Chr7.2286/evm.TU.Chr4.1271/evm.TU.Chr3.334/evm.TU.Chr8.2272/evm.TU.Chr4.504/evm.TU.Chr5.212/evm.TU.Chr5.1217/novel.2875/evm.TU.Chr2.1498/evm.TU.Chr6.2087/evm.TU.Chr1.5088_evm.TU.Chr1.5089/evm.TU.Chr1.2639/evm.TU.Chr2.2124/evm.TU.Chr3.1583/evm.TU.Chr7.2017/evm.TU.Chr2.1975/evm.TU.Chr2.3093/evm.TU.Chr7.1950/evm.TU.Chr3.335/evm.TU.Chr2.2826/evm.TU.Chr5.838/evm.TU.Chr7.2288
biological process	GO:0007165	signal transduction	40	evm.TU.Chr1.5574/evm.TU.Chr2.2009/evm.TU.Chr1.4963/novel.325/evm.TU.Chr6.2938/evm.TU.Chr6.396/novel.2838/evm.TU.Chr2.217/evm.TU.Chr6.392/evm.TU.Chr1.5077/evm.TU.Chr6.3585/evm.TU.Chr1.925/evm.TU.Chr7.1610/novel.2650/novel.844/evm.TU.Chr1.1138/novel.2856/novel.657/evm.TU.Chr1.4744/evm.TU.Chr2.2384/evm.TU.Chr8.66/evm.TU.Chr8.2158/evm.TU.Chr7.663/evm.TU.Chr6.1350/evm.TU.Chr1.3202/evm.TU.Chr5.2164/evm…
biological process	GO:0055085	transmembrane transport	74	evm.TU.Chr7.1632/evm.TU.Chr1.4392/evm.TU.Chr8.1899/novel.2488/evm.TU.Chr5.70_evm.TU.Chr5.71/evm.TU.Chr7.1619/evm.TU.Chr2.886/evm.TU.Chr4.1276/novel.1091/evm.TU.Chr3.2798/evm.TU.Chr8.1773/evm.TU.Chr5.1170/evm.TU.Chr2.2067/evm.TU.Chr4.89/evm.TU.Chr8.829/evm.TU.Chr3.1618/evm.TU.Chr7.2840/evm.TU.Chr8.1543/evm.TU.Chr8.2317/evm.TU.Chr5.1169/novel.1490/novel.1393/novel.1517/evm.TU.Chr4.81/evm.TU.Chr1.20…
cellular component	GO:0048046	apoplast	10	evm.TU.Chr1.5101/evm.TU.Chr1.5262/evm.TU.Chr4.255_evm.TU.Chr4.256/evm.TU.Chr1.5104/novel.1260/novel.1999/evm.TU.Chr3.2286/novel.2444/novel.1094/novel.1259
cellular component	GO:0005576	extracellular region	11	evm.TU.Chr1.5101/evm.TU.Chr1.3207/evm.TU.Chr1.5262/evm.TU.Chr4.255_evm.TU.Chr4.256/evm.TU.Chr1.5104/novel.1260/novel.1999/evm.TU.Chr3.2286/novel.2444/novel.1094/novel.1259
cellular component	GO:0005618	cell wall	13	evm.TU.Chr1.5101/evm.TU.Chr1.5262/evm.TU.Chr4.255_evm.TU.Chr4.256/evm.TU.Chr1.5104/evm.TU.Chr7.2262/novel.1260/novel.1999/evm.TU.Chr3.2286/evm.TU.Chr8.2786_evm.TU.Chr8.2787/novel.2444/novel.1094/novel.1259/evm.TU.Chr7.2263
cellular component	GO:0030312	external encapsulating structure	13	evm.TU.Chr1.5101/evm.TU.Chr1.5262/evm.TU.Chr4.255_evm.TU.Chr4.256/evm.TU.Chr1.5104/evm.TU.Chr7.2262/novel.1260/novel.1999/evm.TU.Chr3.2286/evm.TU.Chr8.2786_evm.TU.Chr8.2787/novel.2444/novel.1094/novel.1259/evm.TU.Chr7.2263
cellular component	GO:0005739	mitochondrion	2	evm.TU.Chr4.523/novel.1077
cellular component	GO:1990904	ribonucleoprotein complex	15	evm.TU.Chr6.384/evm.TU.Chr1.5189/evm.TU.Chr2.2184/evm.TU.Chr3.99/evm.TU.Chr2.95/evm.TU.Chr4.686/evm.TU.Chr7.597/evm.TU.Chr8.2800/evm.TU.Chr1.107/evm.TU.Chr2.1314/evm.TU.Chr7.2901/evm.TU.Chr7.598/evm.TU.Chr6.3057/evm.TU.Chr2.1026/evm.TU.Chr6.3031
cellular component	GO:0071944	cell periphery	17	evm.TU.Chr1.5101/evm.TU.Chr6.1628/evm.TU.Chr3.367/evm.TU.Chr6.810/evm.TU.Chr1.5262/evm.TU.Chr4.255_evm.TU.Chr4.256/evm.TU.Chr1.5104/evm.TU.Chr7.2262/novel.1260/novel.1999/evm.TU.Chr3.2286/evm.TU.Chr8.2786_evm.TU.Chr8.2787/novel.2444/novel.1094/novel.1259/evm.TU.Chr7.2263/evm.TU.Chr1.1224
cellular component	GO:0043228	non-membrane-bounded organelle	23	evm.TU.Chr6.384/evm.TU.Chr1.5189/evm.TU.Chr2.2184/evm.TU.Chr3.668/evm.TU.Chr3.99/evm.TU.Chr2.95/evm.TU.Chr4.686/evm.TU.Chr4.1702/evm.TU.Chr7.597/evm.TU.Chr4.2032/evm.TU.Chr1.107/evm.TU.Chr2.1314/evm.TU.Chr4.2033/evm.TU.Chr7.2901/evm.TU.Chr7.598/evm.TU.Chr3.2191/evm.TU.Chr6.3057/evm.TU.Chr8.2802/evm.TU.Chr6.3219/evm.TU.Chr2.178/evm.TU.Chr1.4529/evm.TU.Chr2.1026/evm.TU.Chr6.3031
cellular component	GO:0043232	intracellular non-membrane-bounded organelle	23	evm.TU.Chr6.384/evm.TU.Chr1.5189/evm.TU.Chr2.2184/evm.TU.Chr3.668/evm.TU.Chr3.99/evm.TU.Chr2.95/evm.TU.Chr4.686/evm.TU.Chr4.1702/evm.TU.Chr7.597/evm.TU.Chr4.2032/evm.TU.Chr1.107/evm.TU.Chr2.1314/evm.TU.Chr4.2033/evm.TU.Chr7.2901/evm.TU.Chr7.598/evm.TU.Chr3.2191/evm.TU.Chr6.3057/evm.TU.Chr8.2802/evm.TU.Chr6.3219/evm.TU.Chr2.178/evm.TU.Chr1.4529/evm.TU.Chr2.1026/evm.TU.Chr6.3031
cellular component	GO:0005634	nucleus	40	evm.TU.Chr5.864/evm.TU.Chr6.1416/evm.TU.Chr7.2688/evm.TU.Chr3.579/evm.TU.Chr6.1415/evm.TU.Chr8.2102/evm.TU.Chr8.944/evm.TU.Chr7.3028/evm.TU.Chr6.1948/evm.TU.Chr8.2401/evm.TU.Chr8.1541/evm.TU.Chr4.504/evm.TU.Chr5.771/evm.TU.Chr1.3601/evm.TU.Chr3.745/evm.TU.Chr4.470/evm.TU.Chr1.3789/evm.TU.Chr5.1217/evm.TU.Chr5.394/evm.TU.Chr1.540/evm.TU.Chr5.1965/evm.TU.Chr8.1460/evm.TU.Chr4.427/evm.TU.Chr7.2650/e…
molecular function	GO:0003700	DNA binding transcription factor activity	79	evm.TU.Chr7.1944/evm.TU.Chr1.1932/evm.TU.Chr3.1011/evm.TU.Chr6.420/evm.TU.Chr7.1473/evm.TU.Chr7.1991/evm.TU.Chr4.1631/evm.TU.Chr5.1279/evm.TU.Chr8.2775/evm.TU.Chr1.5925/evm.TU.Chr2.1929/evm.TU.Chr2.2546/evm.TU.Chr3.2453/evm.TU.Chr1.476/evm.TU.Chr8.944/evm.TU.Chr8.2346/evm.TU.Chr7.2303/evm.TU.Chr1.5245/evm.TU.Chr1.4706/evm.TU.Chr1.1661/evm.TU.Chr5.989/evm.TU.Chr2.2994/evm.TU.Chr1.1547/evm.TU.Chr3.…
molecular function	GO:0140110	transcription regulator activity	82	evm.TU.Chr7.1944/evm.TU.Chr1.1932/evm.TU.Chr3.1011/evm.TU.Chr5.864/evm.TU.Chr6.420/evm.TU.Chr7.1473/evm.TU.Chr7.1991/evm.TU.Chr4.1631/evm.TU.Chr5.1279/evm.TU.Chr8.2775/evm.TU.Chr1.5925/evm.TU.Chr2.1929/evm.TU.Chr2.2546/evm.TU.Chr3.2453/evm.TU.Chr1.476/evm.TU.Chr8.944/evm.TU.Chr8.2346/evm.TU.Chr7.2303/evm.TU.Chr7.3028/evm.TU.Chr1.5245/evm.TU.Chr1.4706/evm.TU.Chr1.1661/evm.TU.Chr5.989/evm.TU.Chr2.2…
molecular function	GO:0016705	oxidoreductase activity, acting on paired donors, with incorporation or reduction of molecular oxygen	47	novel.1749/evm.TU.Chr4.1841/evm.TU.Chr7.1065/evm.TU.Chr4.734/evm.TU.Chr8.237/evm.TU.Chr8.1653/evm.TU.Chr4.1844/novel.1746/novel.115/evm.TU.Chr2.2656/evm.TU.Chr6.1627/novel.502/evm.TU.Chr1.3722/evm.TU.Chr6.1364/novel.143/novel.1750/novel.1647/evm.TU.Chr2.509/evm.TU.Chr7.718/evm.TU.Chr1.1964/evm.TU.Chr6.2213/evm.TU.Chr6.335/evm.TU.Chr5.2493/evm.TU.Chr6.337/novel.3051/evm.TU.Chr6.336/evm.TU.Chr1.196…
molecular function	GO:0005506	iron ion binding	41	evm.TU.Chr4.1841/evm.TU.Chr4.734/evm.TU.Chr4.1844/evm.TU.Chr1.3074/novel.115/evm.TU.Chr2.2656/novel.502/evm.TU.Chr1.3722/novel.143/novel.1647/evm.TU.Chr2.509/evm.TU.Chr1.1964/evm.TU.Chr6.335/evm.TU.Chr5.2493/evm.TU.Chr6.337/evm.TU.Chr7.2512/novel.3051/evm.TU.Chr6.336/evm.TU.Chr1.1969/evm.TU.Chr5.1673/evm.TU.Chr8.1414/evm.TU.Chr1.1512/evm.TU.Chr6.338/novel.1334/novel.2599/novel.1648/evm.TU.Chr8.20…
molecular function	GO:0048037	cofactor binding	95	novel.1749/evm.TU.Chr4.1841/evm.TU.Chr4.734/evm.TU.Chr5.1775/evm.TU.Chr2.331/evm.TU.Chr1.1805/evm.TU.Chr6.1672/evm.TU.Chr6.2820/evm.TU.Chr4.546/evm.TU.Chr8.1653/evm.TU.Chr8.1917/evm.TU.Chr1.5129/evm.TU.Chr4.1844/novel.1746/novel.115/evm.TU.Chr1.1865_evm.TU.Chr1.1866/evm.TU.Chr6.2287/evm.TU.Chr2.2656/evm.TU.Chr1.4767/novel.1482/evm.TU.Chr8.445/evm.TU.Chr6.399/evm.TU.Chr1.3390/evm.TU.Chr6.1907/evm.…
molecular function	GO:0016798	hydrolase activity, acting on glycosyl bonds	54	evm.TU.Chr1.5101/evm.TU.Chr5.1276/evm.TU.Chr7.1416/evm.TU.Chr7.28/evm.TU.Chr4.1106/evm.TU.Chr7.1923/evm.TU.Chr6.1333/evm.TU.Chr3.1342/evm.TU.Chr1.759_evm.TU.Chr1.760_evm.TU.Chr1.761/evm.TU.Chr2.2716/evm.TU.Chr5.2103_evm.TU.Chr5.2104/evm.TU.Chr5.1193/evm.TU.Chr1.1216/evm.TU.Chr4.187/evm.TU.Chr8.2021/evm.TU.Chr1.5262/evm.TU.Chr4.255_evm.TU.Chr4.256/evm.TU.Chr1.5104/evm.TU.Chr1.3856/novel.1260/evm.T…
molecular function	GO:0004553	hydrolase activity, hydrolyzing O-glycosyl compounds	51	evm.TU.Chr1.5101/evm.TU.Chr5.1276/evm.TU.Chr7.1416/evm.TU.Chr7.28/evm.TU.Chr7.1923/evm.TU.Chr6.1333/evm.TU.Chr3.1342/evm.TU.Chr1.759_evm.TU.Chr1.760_evm.TU.Chr1.761/evm.TU.Chr2.2716/evm.TU.Chr5.2103_evm.TU.Chr5.2104/evm.TU.Chr5.1193/evm.TU.Chr1.1216/evm.TU.Chr4.187/evm.TU.Chr8.2021/evm.TU.Chr1.5262/evm.TU.Chr4.255_evm.TU.Chr4.256/evm.TU.Chr1.5104/evm.TU.Chr1.3856/novel.1260/evm.TU.Chr1.4797/evm.T…
molecular function	GO:0016758	transferase activity, transferring hexosyl groups	47	evm.TU.Chr4.1079/evm.TU.Chr4.1605/evm.TU.Chr1.5101/evm.TU.Chr8.2782/evm.TU.Chr3.2223/evm.TU.Chr1.1369/evm.TU.Chr6.444/novel.1786/evm.TU.Chr3.2988/evm.TU.Chr4.1806/evm.TU.Chr1.2971/evm.TU.Chr5.1324/evm.TU.Chr1.1695/evm.TU.Chr1.5262/evm.TU.Chr4.255_evm.TU.Chr4.256/evm.TU.Chr1.5104/evm.TU.Chr1.2694/evm.TU.Chr3.2599/evm.TU.Chr1.3166/novel.1260/evm.TU.Chr2.1307/evm.TU.Chr5.2374/evm.TU.Chr7.2283/novel.…
molecular function	GO:0016762	xyloglucan:xyloglucosyl transferase activity	10	evm.TU.Chr1.5101/evm.TU.Chr1.5262/evm.TU.Chr4.255_evm.TU.Chr4.256/evm.TU.Chr1.5104/novel.1260/novel.1999/evm.TU.Chr3.2286/novel.2444/novel.1094/novel.1259
molecular function	GO:0016757	transferase activity, transferring glycosyl groups	59	evm.TU.Chr4.1079/evm.TU.Chr4.1605/evm.TU.Chr1.5101/evm.TU.Chr3.2868/evm.TU.Chr8.2782/evm.TU.Chr3.2223/evm.TU.Chr1.2781/evm.TU.Chr3.1823/evm.TU.Chr1.1369/evm.TU.Chr6.444/novel.1786/evm.TU.Chr3.2988/evm.TU.Chr1.3196/evm.TU.Chr4.1806/evm.TU.Chr1.2971/novel.468/novel.2571/evm.TU.Chr5.1324/evm.TU.Chr1.1695/evm.TU.Chr1.5262/evm.TU.Chr4.255_evm.TU.Chr4.256/evm.TU.Chr1.5104/evm.TU.Chr1.2694/evm.TU.Chr3.2…
molecular function	GO:0020037	heme binding	45	evm.TU.Chr4.1841/evm.TU.Chr4.734/evm.TU.Chr4.1844/novel.115/evm.TU.Chr6.2287/evm.TU.Chr2.2656/evm.TU.Chr8.445/evm.TU.Chr6.399/novel.502/evm.TU.Chr1.3722/evm.TU.Chr7.211/novel.143/novel.1647/evm.TU.Chr2.509/evm.TU.Chr1.1964/evm.TU.Chr8.1280/evm.TU.Chr6.335/evm.TU.Chr5.2493/evm.TU.Chr6.337/novel.3051/evm.TU.Chr6.336/evm.TU.Chr1.1969/evm.TU.Chr6.2057/evm.TU.Chr5.1673/evm.TU.Chr8.1414/evm.TU.Chr1.151…
molecular function	GO:0046906	tetrapyrrole binding	45	evm.TU.Chr4.1841/evm.TU.Chr4.734/evm.TU.Chr4.1844/novel.115/evm.TU.Chr6.2287/evm.TU.Chr2.2656/evm.TU.Chr8.445/evm.TU.Chr6.399/novel.502/evm.TU.Chr1.3722/evm.TU.Chr7.211/novel.143/novel.1647/evm.TU.Chr2.509/evm.TU.Chr1.1964/evm.TU.Chr8.1280/evm.TU.Chr6.335/evm.TU.Chr5.2493/evm.TU.Chr6.337/novel.3051/evm.TU.Chr6.336/evm.TU.Chr1.1969/evm.TU.Chr6.2057/evm.TU.Chr5.1673/evm.TU.Chr8.1414/evm.TU.Chr1.151…
molecular function	GO:0043565	sequence-specific DNA binding	36	evm.TU.Chr7.1944/evm.TU.Chr3.1011/evm.TU.Chr6.420/evm.TU.Chr7.1473/evm.TU.Chr7.1991/evm.TU.Chr7.2634/evm.TU.Chr1.5245/evm.TU.Chr5.989/evm.TU.Chr1.1547/evm.TU.Chr3.2936/evm.TU.Chr8.1111/evm.TU.Chr8.371/evm.TU.Chr1.792/evm.TU.Chr1.1292/evm.TU.Chr1.1261/evm.TU.Chr1.1680/evm.TU.Chr5.1965/evm.TU.Chr2.1880/evm.TU.Chr1.3140/evm.TU.Chr6.374/evm.TU.Chr4.427/evm.TU.Chr7.2650/evm.TU.Chr7.1537/evm.TU.Chr6.28…
molecular function	GO:0008509	anion transmembrane transporter activity	13	evm.TU.Chr2.886/evm.TU.Chr3.761/evm.TU.Chr7.2840/evm.TU.Chr8.1543/evm.TU.Chr2.3081/evm.TU.Chr3.707/evm.TU.Chr8.605/evm.TU.Chr4.837/evm.TU.Chr5.1166/evm.TU.Chr1.768/evm.TU.Chr4.2759/evm.TU.Chr8.1769/evm.TU.Chr1.364
molecular function	GO:0005215	transporter activity	81	evm.TU.Chr1.4392/evm.TU.Chr8.1899/novel.2488/evm.TU.Chr2.886/evm.TU.Chr3.761/evm.TU.Chr4.1276/evm.TU.Chr3.2234_evm.TU.Chr3.2235_evm.TU.Chr3.2236/evm.TU.Chr3.889/novel.1091/evm.TU.Chr3.2798/evm.TU.Chr4.522/evm.TU.Chr6.2313/novel.175/evm.TU.Chr4.89/evm.TU.Chr8.829/evm.TU.Chr3.2216/evm.TU.Chr7.2840/evm.TU.Chr2.2271/evm.TU.Chr8.1543/evm.TU.Chr2.3081/evm.TU.Chr3.707/evm.TU.Chr6.2409/evm.TU.Chr8.2317/n…
molecular function	GO:0004842	ubiquitin-protein transferase activity	17	evm.TU.Chr7.1899/evm.TU.Chr4.628/evm.TU.Chr8.315/evm.TU.Chr5.725/evm.TU.Chr1.3544/evm.TU.Chr1.3269/evm.TU.Chr7.2598/evm.TU.Chr6.3657/evm.TU.Chr8.2548/evm.TU.Chr5.123/evm.TU.Chr3.1736/evm.TU.Chr1.2472/evm.TU.Chr4.2702/evm.TU.Chr1.3736/evm.TU.Chr1.2606/evm.TU.Chr7.1262/evm.TU.Chr6.1646
molecular function	GO:0019787	ubiquitin-like protein transferase activity	17	evm.TU.Chr7.1899/evm.TU.Chr4.628/evm.TU.Chr8.315/evm.TU.Chr5.725/evm.TU.Chr1.3544/evm.TU.Chr1.3269/evm.TU.Chr7.2598/evm.TU.Chr6.3657/evm.TU.Chr8.2548/evm.TU.Chr5.123/evm.TU.Chr3.1736/evm.TU.Chr1.2472/evm.TU.Chr4.2702/evm.TU.Chr1.3736/evm.TU.Chr1.2606/evm.TU.Chr7.1262/evm.TU.Chr6.1646
molecular function	GO:0016709	oxidoreductase activity, acting on paired donors, with incorporation or reduction of molecular oxygen, NAD(P)H as one donor, and incorporation of one atom of oxygen	7	novel.1749/evm.TU.Chr8.1653/novel.1746/evm.TU.Chr6.1627/novel.1750/evm.TU.Chr6.2213/evm.TU.Chr1.1667
molecular function	GO:0005342	organic acid transmembrane transporter activity	6	evm.TU.Chr2.886/evm.TU.Chr8.1543/evm.TU.Chr8.605/evm.TU.Chr4.837/evm.TU.Chr4.2759/evm.TU.Chr8.1769
molecular function	GO:0015171	amino acid transmembrane transporter activity	6	evm.TU.Chr2.886/evm.TU.Chr8.1543/evm.TU.Chr8.605/evm.TU.Chr4.837/evm.TU.Chr4.2759/evm.TU.Chr8.1769
molecular function	GO:0046943	carboxylic acid transmembrane transporter activity	6	evm.TU.Chr2.886/evm.TU.Chr8.1543/evm.TU.Chr8.605/evm.TU.Chr4.837/evm.TU.Chr4.2759/evm.TU.Chr8.1769
molecular function	GO:0004497	monooxygenase activity	8	novel.1749/evm.TU.Chr8.1653/novel.1746/evm.TU.Chr1.1865_evm.TU.Chr1.1866/evm.TU.Chr6.1627/novel.1750/evm.TU.Chr6.2213/evm.TU.Chr1.1667
molecular function	GO:0008514	organic anion transmembrane transporter activity	6	evm.TU.Chr2.886/evm.TU.Chr8.1543/evm.TU.Chr8.605/evm.TU.Chr4.837/evm.TU.Chr4.2759/evm.TU.Chr8.1769
molecular function	GO:0022857	transmembrane transporter activity	62	evm.TU.Chr1.4392/evm.TU.Chr8.1899/novel.2488/evm.TU.Chr2.886/evm.TU.Chr3.761/evm.TU.Chr4.1276/evm.TU.Chr3.2234_evm.TU.Chr3.2235_evm.TU.Chr3.2236/evm.TU.Chr3.889/novel.1091/evm.TU.Chr3.2798/evm.TU.Chr4.522/novel.175/evm.TU.Chr7.2840/evm.TU.Chr8.1543/evm.TU.Chr2.3081/evm.TU.Chr3.707/evm.TU.Chr8.2317/novel.1490/novel.305/novel.1393/evm.TU.Chr4.81/evm.TU.Chr1.2035/evm.TU.Chr5.212/evm.TU.Chr6.3469/evm…

## Sheet: Table S3
Table S3. GO enrichment analysis of S6_FS vs S6_FY comparison.
Ontoloty	GO ID	GO term	Number of Genes	Gene members
biological process	GO:0003333	amino acid transmembrane transport	4	evm.TU.Chr5.2402/evm.TU.Chr4.837/evm.TU.Chr8.1769/evm.TU.Chr8.605
biological process	GO:0006865	amino acid transport	4	evm.TU.Chr5.2402/evm.TU.Chr4.837/evm.TU.Chr8.1769/evm.TU.Chr8.605
biological process	GO:0006022	aminoglycan metabolic process	5	evm.TU.Chr2.1105/novel.2937/evm.TU.Chr2.1104/evm.TU.Chr1.3856/novel.2947
biological process	GO:1901136	carbohydrate derivative catabolic process	5	evm.TU.Chr7.2463/novel.2937/evm.TU.Chr1.3856/novel.2947/evm.TU.Chr3.3054
biological process	GO:0009308	amine metabolic process	5	evm.TU.Chr1.1805/evm.TU.Chr1.3390/evm.TU.Chr1.2843/evm.TU.Chr2.331/evm.TU.Chr3.1523
biological process	GO:0098656	anion transmembrane transport	5	evm.TU.Chr5.2402/novel.1077/evm.TU.Chr4.837/evm.TU.Chr8.1769/evm.TU.Chr8.605
biological process	GO:1903825	organic acid transmembrane transport	5	evm.TU.Chr5.2402/novel.1077/evm.TU.Chr4.837/evm.TU.Chr8.1769/evm.TU.Chr8.605
biological process	GO:1905039	carboxylic acid transmembrane transport	5	evm.TU.Chr5.2402/novel.1077/evm.TU.Chr4.837/evm.TU.Chr8.1769/evm.TU.Chr8.605
biological process	GO:0000160	phosphorelay signal transduction system	8	evm.TU.Chr1.5574/evm.TU.Chr6.2484_evm.TU.Chr6.2485/evm.TU.Chr6.3585/evm.TU.Chr6.3431/evm.TU.Chr8.2158/evm.TU.Chr2.2009/evm.TU.Chr1.925/evm.TU.Chr2.217
biological process	GO:0006820	anion transport	11	evm.TU.Chr7.2840/evm.TU.Chr7.2626_evm.TU.Chr7.2627/evm.TU.Chr5.2402/evm.TU.Chr5.755/evm.TU.Chr3.761/novel.1077/evm.TU.Chr4.837/evm.TU.Chr1.4911/evm.TU.Chr8.1769/evm.TU.Chr2.2253/evm.TU.Chr8.605
biological process	GO:0006259	DNA metabolic process	14	evm.TU.Chr7.1540/evm.TU.Chr5.423/evm.TU.Chr2.41/evm.TU.Chr6.1650/evm.TU.Chr4.1080/evm.TU.Chr8.2704/evm.TU.Chr6.1199/evm.TU.Chr1.3075/evm.TU.Chr4.2749/evm.TU.Chr3.959_evm.TU.Chr3.960/evm.TU.Chr8.2063/evm.TU.Chr7.2873/novel.2404/evm.TU.Chr3.880
biological process	GO:1901135	carbohydrate derivative metabolic process	14	evm.TU.Chr4.21/evm.TU.Chr1.2015/evm.TU.Chr8.1917/evm.TU.Chr5.1337/evm.TU.Chr7.2463/evm.TU.Chr7.2516/evm.TU.Chr2.1105/novel.2937/evm.TU.Chr2.1104/evm.TU.Chr1.3856/evm.TU.Chr4.1977/novel.2947/evm.TU.Chr3.3054/evm.TU.Chr1.3055
biological process	GO:0005975	carbohydrate metabolic process	22	evm.TU.Chr6.2196/evm.TU.Chr1.2971/evm.TU.Chr6.1951/evm.TU.Chr3.2286/evm.TU.Chr1.747/evm.TU.Chr4.21/novel.1786/evm.TU.Chr1.5262/evm.TU.Chr8.38/evm.TU.Chr1.3268/evm.TU.Chr7.2516/evm.TU.Chr1.752/evm.TU.Chr1.2405/novel.1094/evm.TU.Chr2.1645/evm.TU.Chr5.1276/evm.TU.Chr3.545/evm.TU.Chr1.5101/evm.TU.Chr7.2791/evm.TU.Chr1.3267/evm.TU.Chr3.3054/novel.2203
biological process	GO:0023052	signaling	24	evm.TU.Chr1.5574/evm.TU.Chr1.5077/evm.TU.Chr1.4963/novel.325/evm.TU.Chr7.1359/evm.TU.Chr6.2938/evm.TU.Chr6.2484_evm.TU.Chr6.2485/evm.TU.Chr6.2941/evm.TU.Chr6.3585/novel.2856/novel.657/evm.TU.Chr6.3431/evm.TU.Chr8.2158/evm.TU.Chr8.534/novel.661/evm.TU.Chr8.69/evm.TU.Chr2.2009/evm.TU.Chr1.925/evm.TU.Chr2.217/evm.TU.Chr5.1858/novel.847/novel.2826/novel.2838/novel.487
biological process	GO:0007154	cell communication	26	evm.TU.Chr1.5574/evm.TU.Chr1.5077/evm.TU.Chr4.1810/evm.TU.Chr1.4963/novel.325/evm.TU.Chr7.1359/evm.TU.Chr6.2938/evm.TU.Chr6.2484_evm.TU.Chr6.2485/evm.TU.Chr6.2941/evm.TU.Chr6.3585/novel.2856/novel.657/evm.TU.Chr6.3431/evm.TU.Chr8.2158/evm.TU.Chr1.2475/evm.TU.Chr8.534/novel.661/evm.TU.Chr8.69/evm.TU.Chr2.2009/evm.TU.Chr1.925/evm.TU.Chr2.217/evm.TU.Chr5.1858/novel.847/novel.2826/novel.2838/novel.487
biological process	GO:0055085	transmembrane transport	33	evm.TU.Chr7.1619/evm.TU.Chr7.1632/evm.TU.Chr4.1276/evm.TU.Chr7.2840/evm.TU.Chr1.4392/evm.TU.Chr8.1192/evm.TU.Chr4.1787/evm.TU.Chr2.1695/evm.TU.Chr3.1618/evm.TU.Chr5.1170/evm.TU.Chr2.2709/evm.TU.Chr5.2402/evm.TU.Chr3.2708_evm.TU.Chr3.2709/evm.TU.Chr3.2627_evm.TU.Chr3.2628/evm.TU.Chr8.1197/novel.2488/evm.TU.Chr4.1186/evm.TU.Chr1.2371/evm.TU.Chr6.2087/evm.TU.Chr2.965/novel.1077/evm.TU.Chr7.2536/evm.…
cellular component	GO:0048046	apoplast	6	evm.TU.Chr3.2286/evm.TU.Chr1.5262/novel.1094/evm.TU.Chr1.5101/evm.TU.Chr1.3267/novel.2203
cellular component	GO:0005618	cell wall	8	evm.TU.Chr3.2286/evm.TU.Chr1.5262/novel.1094/evm.TU.Chr7.2262/evm.TU.Chr8.2786_evm.TU.Chr8.2787/evm.TU.Chr1.5101/evm.TU.Chr1.3267/novel.2203
cellular component	GO:0030312	external encapsulating structure	8	evm.TU.Chr3.2286/evm.TU.Chr1.5262/novel.1094/evm.TU.Chr7.2262/evm.TU.Chr8.2786_evm.TU.Chr8.2787/evm.TU.Chr1.5101/evm.TU.Chr1.3267/novel.2203
cellular component	GO:0005576	extracellular region	6	evm.TU.Chr3.2286/evm.TU.Chr1.5262/novel.1094/evm.TU.Chr1.5101/evm.TU.Chr1.3267/novel.2203
cellular component	GO:0015630	microtubule cytoskeleton	2	evm.TU.Chr3.668/evm.TU.Chr8.2802
cellular component	GO:0044430	cytoskeletal part	2	evm.TU.Chr3.668/evm.TU.Chr8.2802
cellular component	GO:0005694	chromosome	4	evm.TU.Chr2.2700/evm.TU.Chr1.3075/evm.TU.Chr4.2749/evm.TU.Chr3.2191
cellular component	GO:0044422	organelle part	5	evm.TU.Chr3.668/evm.TU.Chr1.3075/novel.1077/evm.TU.Chr8.2802/evm.TU.Chr3.2191
cellular component	GO:0044446	intracellular organelle part	5	evm.TU.Chr3.668/evm.TU.Chr1.3075/novel.1077/evm.TU.Chr8.2802/evm.TU.Chr3.2191
cellular component	GO:0044444	cytoplasmic part	5	novel.1077/evm.TU.Chr7.951/evm.TU.Chr3.2452/evm.TU.Chr6.867/evm.TU.Chr7.1048
cellular component	GO:0043228	non-membrane-bounded organelle	7	evm.TU.Chr3.668/evm.TU.Chr2.2700/evm.TU.Chr1.3075/evm.TU.Chr4.2749/evm.TU.Chr6.867/evm.TU.Chr8.2802/evm.TU.Chr3.2191
cellular component	GO:0071944	cell periphery	9	evm.TU.Chr3.2286/evm.TU.Chr6.1628/evm.TU.Chr1.5262/novel.1094/evm.TU.Chr7.2262/evm.TU.Chr8.2786_evm.TU.Chr8.2787/evm.TU.Chr1.5101/evm.TU.Chr1.3267/novel.2203
cellular component	GO:0005634	nucleus	16	evm.TU.Chr5.423/evm.TU.Chr8.2401/evm.TU.Chr5.1524/evm.TU.Chr8.2102/evm.TU.Chr1.3075/evm.TU.Chr7.2688/evm.TU.Chr7.3028/evm.TU.Chr4.2464/evm.TU.Chr1.1418/evm.TU.Chr1.5645/evm.TU.Chr5.864/evm.TU.Chr8.2209/evm.TU.Chr1.1067/evm.TU.Chr5.22/evm.TU.Chr5.771/evm.TU.Chr8.1506
molecular function	GO:0140110	transcription regulator activity	35	evm.TU.Chr1.1932/evm.TU.Chr1.5925/evm.TU.Chr8.2775/evm.TU.Chr5.1992/evm.TU.Chr6.2367/evm.TU.Chr7.1944/evm.TU.Chr5.1524/evm.TU.Chr3.2453/evm.TU.Chr6.3536/evm.TU.Chr3.1075/evm.TU.Chr1.2855/evm.TU.Chr1.3365/evm.TU.Chr1.1102/evm.TU.Chr7.1846/evm.TU.Chr1.1680/evm.TU.Chr1.476/evm.TU.Chr6.2873/evm.TU.Chr1.1547/evm.TU.Chr4.904/evm.TU.Chr7.3028/evm.TU.Chr1.861/evm.TU.Chr4.2464/evm.TU.Chr8.421/evm.TU.Chr2.…
molecular function	GO:0003700	DNA binding transcription factor activity	32	evm.TU.Chr1.1932/evm.TU.Chr1.5925/evm.TU.Chr8.2775/evm.TU.Chr5.1992/evm.TU.Chr6.2367/evm.TU.Chr7.1944/evm.TU.Chr5.1524/evm.TU.Chr3.2453/evm.TU.Chr6.3536/evm.TU.Chr3.1075/evm.TU.Chr1.2855/evm.TU.Chr1.3365/evm.TU.Chr1.1102/evm.TU.Chr7.1846/evm.TU.Chr1.1680/evm.TU.Chr1.476/evm.TU.Chr6.2873/evm.TU.Chr1.1547/evm.TU.Chr4.904/evm.TU.Chr1.861/evm.TU.Chr8.421/evm.TU.Chr2.1805/evm.TU.Chr8.2346/evm.TU.Chr4.…
molecular function	GO:0016701	oxidoreductase activity, acting on single donors with incorporation of molecular oxygen	8	evm.TU.Chr7.136/evm.TU.Chr4.587/evm.TU.Chr4.1389/evm.TU.Chr1.2405/evm.TU.Chr3.545/evm.TU.Chr6.82/evm.TU.Chr3.379/evm.TU.Chr4.448_evm.TU.Chr4.450
molecular function	GO:0008509	anion transmembrane transporter activity	8	evm.TU.Chr7.2840/evm.TU.Chr7.2626_evm.TU.Chr7.2627/evm.TU.Chr5.2402/evm.TU.Chr3.761/evm.TU.Chr4.837/evm.TU.Chr8.1769/evm.TU.Chr2.2253/evm.TU.Chr8.605
molecular function	GO:0016762	xyloglucan:xyloglucosyl transferase activity	6	evm.TU.Chr3.2286/evm.TU.Chr1.5262/novel.1094/evm.TU.Chr1.5101/evm.TU.Chr1.3267/novel.2203
molecular function	GO:0016702	oxidoreductase activity, acting on single donors with incorporation of molecular oxygen, incorporation of two atoms of oxygen	6	evm.TU.Chr7.136/evm.TU.Chr4.587/evm.TU.Chr4.1389/evm.TU.Chr6.82/evm.TU.Chr3.379/evm.TU.Chr4.448_evm.TU.Chr4.450
molecular function	GO:0004857	enzyme inhibitor activity	9	evm.TU.Chr1.2544/evm.TU.Chr8.2102/evm.TU.Chr4.250/evm.TU.Chr1.4862/evm.TU.Chr5.2123/novel.1515/evm.TU.Chr7.2262/evm.TU.Chr8.2786_evm.TU.Chr8.2787/evm.TU.Chr8.2788
molecular function	GO:0051213	dioxygenase activity	6	evm.TU.Chr7.136/evm.TU.Chr4.587/evm.TU.Chr4.1389/evm.TU.Chr6.82/evm.TU.Chr3.379/evm.TU.Chr4.448_evm.TU.Chr4.450
molecular function	GO:0005342	organic acid transmembrane transporter activity	4	evm.TU.Chr5.2402/evm.TU.Chr4.837/evm.TU.Chr8.1769/evm.TU.Chr8.605
molecular function	GO:0015171	amino acid transmembrane transporter activity	4	evm.TU.Chr5.2402/evm.TU.Chr4.837/evm.TU.Chr8.1769/evm.TU.Chr8.605
molecular function	GO:0046943	carboxylic acid transmembrane transporter activity	4	evm.TU.Chr5.2402/evm.TU.Chr4.837/evm.TU.Chr8.1769/evm.TU.Chr8.605
molecular function	GO:0016758	transferase activity, transferring hexosyl groups	17	evm.TU.Chr1.2971/evm.TU.Chr3.2286/evm.TU.Chr8.1488/novel.1786/evm.TU.Chr6.551/evm.TU.Chr1.5262/evm.TU.Chr6.450/evm.TU.Chr1.1369/evm.TU.Chr8.38/evm.TU.Chr6.444/evm.TU.Chr4.1079/novel.1094/evm.TU.Chr6.552/evm.TU.Chr1.5101/evm.TU.Chr1.3267/evm.TU.Chr1.3055/novel.2203
molecular function	GO:0046983	protein dimerization activity	18	novel.2659/novel.28/evm.TU.Chr5.2339/novel.1793/evm.TU.Chr2.2300/evm.TU.Chr6.767/novel.1285/evm.TU.Chr8.2580/evm.TU.Chr3.2414/evm.TU.Chr1.2071/evm.TU.Chr1.522/novel.2125/evm.TU.Chr1.3568/evm.TU.Chr1.5219/evm.TU.Chr6.1335/evm.TU.Chr8.1273/evm.TU.Chr3.2416/evm.TU.Chr6.2188

## Sheet: Table S4
Table S4. KEGG pathway enrichment analysis of S5_FS vs S5_FY comparison.
KEGGID	Pathway	Number of Genes	Gene members
pmum04075	Plant hormone signal transduction	50	evm.TU.Chr7.2777/evm.TU.Chr1.5574/evm.TU.Chr7.1731/evm.TU.Chr8.2578/evm.TU.Chr7.2688/evm.TU.Chr7.1473/evm.TU.Chr3.579/evm.TU.Chr7.2701/evm.TU.Chr8.1343/evm.TU.Chr8.2615_evm.TU.Chr8.2616/evm.TU.Chr6.3585/evm.TU.Chr8.2346/evm.TU.Chr1.925/evm.TU.Chr3.1723/evm.TU.Chr2.1872/evm.TU.Chr8.2401/evm.TU.Chr1.1562/evm.TU.Chr4.504/evm.TU.Chr8.371/evm.TU.Chr1.5262/evm.TU.Chr1.792/evm.TU.Chr1.4744/evm.TU.Chr3.7…
pmum04016	MAPK signaling pathway - plant	27	evm.TU.Chr7.2777/evm.TU.Chr1.5574/evm.TU.Chr7.1731/evm.TU.Chr6.420/evm.TU.Chr5.1081/evm.TU.Chr2.2907/evm.TU.Chr6.855/evm.TU.Chr8.1343/evm.TU.Chr6.3585/evm.TU.Chr8.2346/evm.TU.Chr5.127/evm.TU.Chr1.1812/evm.TU.Chr1.5550/evm.TU.Chr6.2895/novel.2947/evm.TU.Chr2.1801/evm.TU.Chr1.3755/evm.TU.Chr6.3593/evm.TU.Chr5.1472/evm.TU.Chr1.1714/novel.2937/evm.TU.Chr6.151/evm.TU.Chr6.649/evm.TU.Chr6.876/evm.TU.Ch…
pmum04626	Plant-pathogen interaction	27	evm.TU.Chr5.2354/evm.TU.Chr6.420/evm.TU.Chr5.1081/evm.TU.Chr6.855/evm.TU.Chr1.4002/evm.TU.Chr7.725/evm.TU.Chr5.2351/evm.TU.Chr4.209/evm.TU.Chr6.356/evm.TU.Chr1.2524/evm.TU.Chr6.69/evm.TU.Chr6.71/evm.TU.Chr3.1706/evm.TU.Chr6.2895/evm.TU.Chr6.3046/evm.TU.Chr1.4942/evm.TU.Chr1.3755/evm.TU.Chr6.1334/evm.TU.Chr8.1974/evm.TU.Chr5.939/evm.TU.Chr4.515/evm.TU.Chr7.1198/evm.TU.Chr5.674/evm.TU.Chr1.5723/evm…
pmum00500	Starch and sucrose metabolism	25	evm.TU.Chr1.2167/evm.TU.Chr1.3252/evm.TU.Chr5.1276/evm.TU.Chr8.2782/evm.TU.Chr8.1130/evm.TU.Chr1.2060/evm.TU.Chr3.2689/evm.TU.Chr5.720/evm.TU.Chr2.2716/evm.TU.Chr5.2103_evm.TU.Chr5.2104/evm.TU.Chr1.2486/evm.TU.Chr7.2538/evm.TU.Chr5.1193/evm.TU.Chr1.1216/evm.TU.Chr1.2971/evm.TU.Chr4.187/evm.TU.Chr1.747/evm.TU.Chr7.2283/evm.TU.Chr3.473/evm.TU.Chr6.590/evm.TU.Chr7.96/evm.TU.Chr1.5055/evm.TU.Chr8.141…
pmum00710	Carbon fixation in photosynthetic organisms	17	evm.TU.Chr7.1530/evm.TU.Chr4.1241/evm.TU.Chr1.2621/evm.TU.Chr6.2196/evm.TU.Chr1.3498/evm.TU.Chr4.1223/evm.TU.Chr7.1531/evm.TU.Chr1.2814/evm.TU.Chr3.1494/evm.TU.Chr5.2359/evm.TU.Chr8.1657/evm.TU.Chr6.2383_evm.TU.Chr6.2384/novel.857/evm.TU.Chr4.547/evm.TU.Chr4.1270/evm.TU.Chr1.2726/novel.3078
pmum00270	Cysteine and methionine metabolism	19	evm.TU.Chr1.2843/evm.TU.Chr7.2678/evm.TU.Chr1.1677/evm.TU.Chr2.3048/evm.TU.Chr6.1907/evm.TU.Chr1.2492/evm.TU.Chr8.1490/evm.TU.Chr7.2467_evm.TU.Chr7.2468/evm.TU.Chr8.90/evm.TU.Chr1.173/evm.TU.Chr4.1617/evm.TU.Chr2.1801/evm.TU.Chr8.1657/evm.TU.Chr4.547/novel.1834/evm.TU.Chr1.5712/evm.TU.Chr7.2154/evm.TU.Chr3.2487/evm.TU.Chr1.3428
pmum00330	Arginine and proline metabolism	12	evm.TU.Chr1.2227/evm.TU.Chr6.2296/evm.TU.Chr1.2843/evm.TU.Chr1.931/evm.TU.Chr2.2371/evm.TU.Chr8.1690/evm.TU.Chr3.2852/evm.TU.Chr2.3048/evm.TU.Chr8.1019/evm.TU.Chr3.138/evm.TU.Chr3.2483/evm.TU.Chr3.2487
pmum01250	Biosynthesis of nucleotide sugars	17	evm.TU.Chr1.2167/evm.TU.Chr8.1130/evm.TU.Chr1.5018/evm.TU.Chr1.2060/evm.TU.Chr1.4334/evm.TU.Chr2.1953/evm.TU.Chr7.2538/evm.TU.Chr5.447/evm.TU.Chr5.1585/evm.TU.Chr6.1174/evm.TU.Chr8.2295/evm.TU.Chr1.5284/evm.TU.Chr7.2512/evm.TU.Chr3.2541/evm.TU.Chr5.990/evm.TU.Chr3.545/evm.TU.Chr1.3976
pmum00520	Amino sugar and nucleotide sugar metabolism	21	evm.TU.Chr1.2167/evm.TU.Chr8.1130/evm.TU.Chr1.5018/evm.TU.Chr1.2060/evm.TU.Chr7.223/evm.TU.Chr1.4334/evm.TU.Chr2.1953/evm.TU.Chr7.2538/evm.TU.Chr5.447/evm.TU.Chr5.1585/evm.TU.Chr1.3856/evm.TU.Chr6.1174/evm.TU.Chr1.5284/novel.2947/novel.727/evm.TU.Chr1.3835/novel.2937/evm.TU.Chr3.2541/evm.TU.Chr7.2930/evm.TU.Chr5.990/evm.TU.Chr1.3976
pmum00196	Photosynthesis - antenna proteins	6	evm.TU.Chr3.1866/evm.TU.Chr4.712/evm.TU.Chr3.68/evm.TU.Chr4.1779/evm.TU.Chr2.2463/evm.TU.Chr6.47
pmum00960	Tropane, piperidine and pyridine alkaloid biosynthesis	6	evm.TU.Chr5.1775/evm.TU.Chr1.3390/evm.TU.Chr6.653/evm.TU.Chr4.1617/evm.TU.Chr5.817/evm.TU.Chr1.5778
pmum00010	Glycolysis / Gluconeogenesis	20	evm.TU.Chr1.2167/evm.TU.Chr5.2574/evm.TU.Chr7.1530/evm.TU.Chr4.1241/evm.TU.Chr6.2820/evm.TU.Chr4.546/evm.TU.Chr1.931/evm.TU.Chr6.2196/evm.TU.Chr1.4767/evm.TU.Chr1.2744/evm.TU.Chr7.1568/evm.TU.Chr1.3498/evm.TU.Chr7.2538/evm.TU.Chr4.769/evm.TU.Chr6.3029/evm.TU.Chr4.1223/evm.TU.Chr7.1531/evm.TU.Chr6.2383_evm.TU.Chr6.2384/evm.TU.Chr3.3021/novel.3078
pmum00100	Steroid biosynthesis	7	evm.TU.Chr4.734/evm.TU.Chr8.1653/evm.TU.Chr1.3722/evm.TU.Chr1.3948/evm.TU.Chr6.2214/evm.TU.Chr3.3124/evm.TU.Chr1.1667
pmum00950	Isoquinoline alkaloid biosynthesis	5	evm.TU.Chr5.1775/evm.TU.Chr1.3390/evm.TU.Chr4.1617/evm.TU.Chr5.817/evm.TU.Chr1.5778
pmum00260	Glycine, serine and threonine metabolism	13	evm.TU.Chr5.1775/evm.TU.Chr1.4767/evm.TU.Chr1.3390/evm.TU.Chr6.1907/evm.TU.Chr1.2492/evm.TU.Chr6.3029/evm.TU.Chr8.90/evm.TU.Chr1.173/evm.TU.Chr1.798/evm.TU.Chr5.2197/evm.TU.Chr5.817/evm.TU.Chr3.1522/evm.TU.Chr1.5778
pmum00730	Thiamine metabolism	6	evm.TU.Chr3.3120/evm.TU.Chr1.4549/evm.TU.Chr7.2165/evm.TU.Chr8.2668/evm.TU.Chr6.2150/evm.TU.Chr8.2230
pmum00360	Phenylalanine metabolism	6	evm.TU.Chr5.1775/evm.TU.Chr8.1690/evm.TU.Chr1.3390/evm.TU.Chr4.1617/evm.TU.Chr5.817/evm.TU.Chr1.5778
pmum00040	Pentose and glucuronate interconversions	9	evm.TU.Chr4.250/evm.TU.Chr1.503/evm.TU.Chr5.863/evm.TU.Chr5.447/evm.TU.Chr7.2262/evm.TU.Chr3.797/evm.TU.Chr3.302/evm.TU.Chr8.2786_evm.TU.Chr8.2787/evm.TU.Chr1.5324
pmum01200	Carbon metabolism	32	evm.TU.Chr1.2167/evm.TU.Chr7.1530/evm.TU.Chr4.1241/evm.TU.Chr1.2621/evm.TU.Chr6.2196/evm.TU.Chr1.4767/evm.TU.Chr1.2744/evm.TU.Chr7.951/evm.TU.Chr7.1568/evm.TU.Chr1.3498/evm.TU.Chr7.2538/evm.TU.Chr4.769/evm.TU.Chr3.2943/evm.TU.Chr6.3029/evm.TU.Chr3.2247/evm.TU.Chr4.1223/evm.TU.Chr7.1531/evm.TU.Chr8.2771/evm.TU.Chr1.2814/evm.TU.Chr3.1494/evm.TU.Chr5.2359/evm.TU.Chr1.798/evm.TU.Chr5.2180/evm.TU.Chr8…
pmum00940	Phenylpropanoid biosynthesis	13	evm.TU.Chr6.2287/evm.TU.Chr8.445/evm.TU.Chr6.399/evm.TU.Chr3.1051/novel.502/evm.TU.Chr7.211/evm.TU.Chr2.3181/evm.TU.Chr1.5110/evm.TU.Chr6.2057/evm.TU.Chr5.1113/evm.TU.Chr6.2055/evm.TU.Chr5.1364/evm.TU.Chr1.3212

## Sheet: Table S5
Table S5. KEGG pathway enrichment analysis of S6_FS vs S6_FY comparison.
KEGGID	Pathway	Number of Genes	Gene members
pmum04075	Plant hormone signal transduction	22	evm.TU.Chr7.2777/evm.TU.Chr1.5574/evm.TU.Chr8.2401/evm.TU.Chr6.2315/evm.TU.Chr8.1509/evm.TU.Chr6.3543/evm.TU.Chr6.3585/evm.TU.Chr1.5262/evm.TU.Chr2.1727/evm.TU.Chr8.1012/evm.TU.Chr6.3431/evm.TU.Chr7.2688/evm.TU.Chr1.1418/evm.TU.Chr8.2346/evm.TU.Chr8.1011/evm.TU.Chr1.5550/evm.TU.Chr3.365/evm.TU.Chr7.2307/evm.TU.Chr1.5645/evm.TU.Chr6.1320/evm.TU.Chr1.925/evm.TU.Chr1.1067
pmum00592	alpha-Linolenic acid metabolism	7	evm.TU.Chr7.726/evm.TU.Chr7.2359/evm.TU.Chr1.1969/evm.TU.Chr7.951/evm.TU.Chr3.2452/evm.TU.Chr3.379/evm.TU.Chr4.448_evm.TU.Chr4.450
pmum04016	MAPK signaling pathway - plant	11	evm.TU.Chr7.2777/evm.TU.Chr1.5574/evm.TU.Chr2.2907/evm.TU.Chr6.3585/evm.TU.Chr1.4849/evm.TU.Chr2.1805/evm.TU.Chr8.2346/evm.TU.Chr6.3368_evm.TU.Chr6.3369/evm.TU.Chr1.5550/novel.2937/novel.2947
pmum00910	Nitrogen metabolism	5	evm.TU.Chr8.323/evm.TU.Chr4.2570/evm.TU.Chr2.3042/evm.TU.Chr8.329/evm.TU.Chr1.817
pmum01232	Nucleotide metabolism	9	evm.TU.Chr3.2113/evm.TU.Chr4.1128/evm.TU.Chr6.1650/evm.TU.Chr4.1125/evm.TU.Chr1.2015/evm.TU.Chr4.2270/evm.TU.Chr7.2463/evm.TU.Chr7.934/evm.TU.Chr1.5507
pmum04712	Circadian rhythm - plant	5	evm.TU.Chr8.461/evm.TU.Chr6.3747/evm.TU.Chr6.2484_evm.TU.Chr6.2485/evm.TU.Chr1.1102/evm.TU.Chr2.2009
pmum00240	Pyrimidine metabolism	7	evm.TU.Chr3.2113/evm.TU.Chr4.1128/evm.TU.Chr6.1650/evm.TU.Chr4.1125/evm.TU.Chr1.2015/evm.TU.Chr7.2463/evm.TU.Chr1.5507
pmum00562	Inositol phosphate metabolism	7	evm.TU.Chr3.329/evm.TU.Chr6.1951/evm.TU.Chr7.1608/evm.TU.Chr1.2405/evm.TU.Chr3.545/evm.TU.Chr1.828/evm.TU.Chr5.2174
pmum00591	Linoleic acid metabolism	3	evm.TU.Chr7.726/evm.TU.Chr3.379/evm.TU.Chr4.448_evm.TU.Chr4.450
pmum00040	Pentose and glucuronate interconversions	6	evm.TU.Chr1.5324/evm.TU.Chr4.250/evm.TU.Chr5.863/evm.TU.Chr2.2064/evm.TU.Chr7.2262/evm.TU.Chr8.2786_evm.TU.Chr8.2787
pmum03030	DNA replication	6	evm.TU.Chr1.1239/evm.TU.Chr5.423/evm.TU.Chr8.2704/evm.TU.Chr7.2873/evm.TU.Chr6.1335/evm.TU.Chr2.1260
pmum00590	Arachidonic acid metabolism	3	evm.TU.Chr6.1902/evm.TU.Chr7.726/evm.TU.Chr1.2204
pmum00940	Phenylpropanoid biosynthesis	6	evm.TU.Chr3.1051/evm.TU.Chr1.5110/novel.502/evm.TU.Chr7.211/evm.TU.Chr3.1099/evm.TU.Chr6.2929
pmum00410	beta-Alanine metabolism	4	evm.TU.Chr1.3390/evm.TU.Chr1.2437/evm.TU.Chr7.951/evm.TU.Chr3.138
pmum00950	Isoquinoline alkaloid biosynthesis	2	evm.TU.Chr1.3390/evm.TU.Chr4.1617
pmum00260	Glycine, serine and threonine metabolism	5	evm.TU.Chr1.3390/evm.TU.Chr6.2924/evm.TU.Chr1.798/evm.TU.Chr5.2197/evm.TU.Chr3.1523
pmum00030	Pentose phosphate pathway	4	evm.TU.Chr4.21/evm.TU.Chr5.1337/evm.TU.Chr7.2516/evm.TU.Chr5.2180
pmum00945	Stilbenoid, diarylheptanoid and gingerol biosynthesis	2	evm.TU.Chr3.1051/novel.502
pmum00960	Tropane, piperidine and pyridine alkaloid biosynthesis	2	evm.TU.Chr1.3390/evm.TU.Chr4.1617
pmum00480	Glutathione metabolism	5	evm.TU.Chr6.1902/evm.TU.Chr6.1650/evm.TU.Chr5.1337/evm.TU.Chr1.1319/evm.TU.Chr5.2460

## Sheet: Table S6
Table S6. DEGs involved in plant hormone signal transduction of FS vs FY comparisons.
			FPKM
	Gene description	GeneID	S5_FS	S5_FY	S6_FS	S6_FY
Auxin signal pathway	IAA	evm.TU.Chr7.2688	38.4617	3.48643	32.5388	9.79495
	IAA	evm.TU.Chr3.579	61.0844	19.6364	29.7449	17.8197
	IAA	evm.TU.Chr8.2401	15.9641	3.65793	23.289	3.41048
	IAA	evm.TU.Chr3.745	586.654	265.176	326.902	196.672
	IAA	evm.TU.Chr1.3789	7.14878	1.26136	1.25085	0.445013
	IAA	evm.TU.Chr3.744	94.6377	46.5643	83.791	54.1223
	IAA	evm.TU.Chr6.3543	78.2721	44.3166	56.1922	25.8429
	IAA	evm.TU.Chr1.1418	15.1072	9.5293	9.27689	2.78178
	IAA	evm.TU.Chr1.1067	15.438	22.3981	46.9304	20.7473
	GH3	evm.TU.Chr8.1509	197.678	19.7578	85.0533	18.8504
	GH3	evm.TU.Chr6.2315	5.25834	12.8751	4.78506	15.971
	GH3	evm.TU.Chr4.1827	0.694416	0.00864533	0.342104	0.041851
	ARF	evm.TU.Chr4.504	9.02827	18.6751	11.9493	15.7676
	ARF	evm.TU.Chr5.1217	0.0932154	1.63453	0.394114	0.992834
	SAUR	evm.TU.Chr2.1498	16.7433	5.47981	3.7428	2.93341
	SAUR	evm.TU.Chr7.2017	2.64546	0.379891	0.198085	0.0890302
	SAUR	evm.TU.Chr2.1975	0.481504	1.8773	0.385995	1.67488
	SAUR	evm.TU.Chr2.3093	6.10609	2.4294	1.814	2.98682
	SAUR	evm.TU.Chr3.335	2.42448	0.425069	0.0417953	0.139667
	SAUR	evm.TU.Chr7.2288	2.14652	0.6912	1.7589	1.153
	SAUR	evm.TU.Chr8.1012	3.50263	4.07979	5.47661	19.2362
	SAUR	evm.TU.Chr8.1011	7.02165	11.2166	19.1924	8.66892
Cytokinin signal pathway	ARR-B	evm.TU.Chr1.4744	34.4841	69.6107	84.1843	83.3556
	ARR-A	evm.TU.Chr7.663	37.7741	4.33671	26.7997	45.4686
	ARR-A	evm.TU.Chr1.3202	14.7988	2.12334	6.90565	12.0789
	ARR-A	evm.TU.Chr2.225	2.71873	0.362181	0.336538	1.37151
	ARR-A	evm.TU.Chr5.677	5.38832	0.122007	4.07101	10.5604
	ARR-A	evm.TU.Chr1.925	9.68357	0.220436	14.7107	5.84872
	AHP	evm.TU.Chr6.3431	69.7923	51.7594	37.6157	13.7637
Gibberellin signal pathway	GID1	evm.TU.Chr8.2578	271.922	67.7908	161.495	85.6613
	GID2	evm.TU.Chr1.1562	18.2879	47.1454	39.9024	45.1963
	DELLA	evm.TU.Chr7.2701	4.83911	35.3038	15.6104	22.3747
	DELLA	evm.TU.Chr3.1723	15.0748	31.5102	11.8447	15.8717
Abscisic acid signal pathway	SNRK2	evm.TU.Chr7.1731	93.7973	23.1853	36.9983	33.2881
	SNRK2	evm.TU.Chr8.1343	72.3932	24.9748	45.3783	38.4027
	ABF	evm.TU.Chr7.1473	6.97532	29.1132	6.96298	13.7029
	ABF	evm.TU.Chr8.371	38.1997	18.5099	14.4776	14.2019
	PYL	evm.TU.Chr1.1714	0.78254	2.943	2.03513	2.57487
	PYL	evm.TU.Chr2.2542	0.875108	0.152835	0.484806	0.281575
Ethylene signal pathway	ETR	evm.TU.Chr1.5574	380.834	61.4363	276.314	65.3815
	ETR	evm.TU.Chr6.3585	15.1962	6.77497	11.4075	5.51167
	MPK6	evm.TU.Chr6.876	2.82943	0.562761	0.909437	0.910825
	EBF1/2	evm.TU.Chr7.2777	48.0746	3.61568	33.3628	2.56928
	EIN3	evm.TU.Chr6.151	3.37821	1.47496	1.35106	1.72753
	ERF	evm.TU.Chr8.2346	19.7578	0.0152501	0.928082	0.0190996
	ERF	evm.TU.Chr1.5550	22.805	5.54601	6.20263	1.58683
	ERF	evm.TU.Chr6.3593	5.83269	0	0.116388	0.0904963
Brassinosteroid signal pathway	TCH4	evm.TU.Chr1.5262	28.1755	9.41891	268.15	12.0427
	TCH4	evm.TU.Chr1.5104	3.03799	0.224171	6.56226	0.0714421
	CYCD3	evm.TU.Chr8.1460	3.24731	8.56881	31.8346	22.3049
	BSK	evm.TU.Chr2.1727	1.61847	2.34404	1.99487	5.32278
Jasmonic acid signal pathway	JAR	evm.TU.Chr2.1872	69.3843	31.1626	43.03	26.2549
	JAZ	evm.TU.Chr3.365	199.984	36.673	42.0522	13.6119
	JAZ	evm.TU.Chr7.2307	705.653	376.497	371.689	160.476

## Sheet: Table S7
Table S7. DEGs involved in starch and sucrose metabolism of FS vs FY comparisons.
		FPKM
Gene description	GeneID	S5_FS	S5_FY	S6_FS	S6_FY
SUS	evm.TU.Chr8.2782	558.101	170.396	145.999	160.264
SUS	evm.TU.Chr7.2283	547.986	246.148	573.418	883.247
HK	evm.TU.Chr1.2167	314.967	68.9459	105.001	109.884
HK	evm.TU.Chr7.2538	29.5297	67.2925	47.6847	68.7496
TPS	evm.TU.Chr1.3252	36.8881	6.59658	7.78833	7.64114
TPS	evm.TU.Chr5.720	68.5812	26.8463	26.5051	51.8214
TPS	evm.TU.Chr1.2486	189.417	85.9749	71.0996	86.238
TPS	evm.TU.Chr1.5055	3.02155	1.11403	0.85263	1.24053
scrK	evm.TU.Chr1.3976	13.5524	6.59112	8.00184	6.26451
β-glucanase	evm.TU.Chr5.1276	132.574	597.523	828.102	1772.64
β-glucosidase	evm.TU.Chr1.1216	2.23138	7.26555	5.61126	5.42501
β-glucosidase	evm.TU.Chr4.1879	47.3709	13.839	10.1509	11.6019
otsB	evm.TU.Chr1.747	5.91715	1.44906	3.38936	0.965162
bglX	evm.TU.Chr7.96	5.74162	2.28	2.12995	1.4149
treA	evm.TU.Chr5.1193	17.1147	35.232	35.928	54.1536
sacA	evm.TU.Chr2.2716	2.09901	8.6653	2.4665	4.96576
sacA	evm.TU.Chr3.473	4.03807	0.0222529	1.06596	0.13342
glgC	evm.TU.Chr8.1130	9.60926	39.6358	53.7193	45.3551
glgC	evm.TU.Chr1.2060	15.1318	72.3162	65.9136	126.499
glgA	evm.TU.Chr3.2689	10.1444	35.1042	24.1378	38.0693
glgP	evm.TU.Chr1.2971	32.74	13.719	14.2138	5.53223
glgP	evm.TU.Chr6.590	4.11949	8.60427	10.9067	14.3616
β-amylase	evm.TU.Chr5.2103_evm.TU.Chr5.2104	6.34337	22.3222	22.6175	31.0462
β-amylase	evm.TU.Chr2.1736	4.80428	10.3025	11.5148	10.346
AMY	evm.TU.Chr8.1412	6.16805	2.31303	4.61432	2.29618

## Sheet: Table S8
Table S8. DEGs involved in MAPK signaling pathway of FS vs FY comparisons.
		FPKM
Gene description	GeneID	S5_FS	S5_FY	S6_FS	S6_FY
WRKY33	evm.TU.Chr6.420	34.3213	4.91998	5.67394	3.87247
WRKY33	evm.TU.Chr6.2895	67.1687	4.04401	1.64667	2.69392
WRKY22	evm.TU.Chr2.1805	0.972071	0.179555	0.873747	0.0453914
EBF1/2	evm.TU.Chr7.2777	48.0746	3.61568	33.3628	2.56928
ETR	evm.TU.Chr1.5574	380.834	61.4363	276.314	65.3815
ETR	evm.TU.Chr6.3585	15.1962	6.77497	11.4075	5.51167
ERF	evm.TU.Chr1.5550	22.805	5.54601	6.20263	1.58683
ERF	evm.TU.Chr6.3593	5.83269	0	0.116388	0.0904963
ERF	evm.TU.Chr8.2346	19.7578	0.0152501	0.928082	0.0190996
EIN3	evm.TU.Chr6.151	3.37821	1.47496	1.35106	1.72753
SNRK2	evm.TU.Chr7.1731	93.7973	23.1853	36.9983	33.2881
SNRK2	evm.TU.Chr8.1343	72.3932	24.9748	45.3783	38.4027
PYL	evm.TU.Chr1.1714	0.78254	2.943	2.03513	2.57487
PYL	evm.TU.Chr2.2542	0.875108	0.152835	0.484806	0.281575
ACS	evm.TU.Chr2.1801	0.608479	0	0.147076	0
PP2C	evm.TU.Chr6.649	87.5528	300.635	276.93	388.038
RBOH	evm.TU.Chr5.1081	31.8824	76.1698	63.9684	72.0438
RBOH	evm.TU.Chr1.3755	73.2304	36.0173	86.8599	56.252
YDA	evm.TU.Chr2.2907	42.4373	14.0631	38.8441	17.9425
MPK3	evm.TU.Chr6.855	116.571	29.5315	39.5728	29.1827
MPK6	evm.TU.Chr6.876	2.82943	0.562761	0.909437	0.910825
MKK9	evm.TU.Chr5.127	496.81	244.13	192.716	133.641
ANP1	evm.TU.Chr6.3368	1.56488	1.0886	2.66074	1.21051
ATP7	evm.TU.Chr5.1472	0.598633	0.0240286	0.165573	0.0697746
ER	evm.TU.Chr1.1812	11.2573	26.1701	19.1434	25.0223
ER	evm.TU.Chr7.805	18.4658	4.05915	2.78803	4.9879
CALM	evm.TU.Chr1.4849	4.00265	3.69263	9.90079	4.08661

## Sheet: Table S9
Table S9. Primer sequences used for quantitative reverse transcription-PCR.
Gene name	Gene ID	Forward primer	Reverse primer
Actin	evm.TU.Chr6.1716	CTGGACCTTGCTGGTCGT	ATTTCCCGCTCAGCAGTG
IAA	evm.TU.Chr3.745	AAGTACGTGAAAGTGGCAGTAGATG	TACGGATGGTCAAGAAGGAGAAC
ETR	evm.TU.Chr1.5574	ATTTTGTTGCTCCTCGTTTGTG	AATGGGGATGGAAAAGTAGGC
JAZ	evm.TU.Chr7.2307	ACAATCCAACGGGACAGGG	CAGGAGTTGCTGGCAGGTTC
HK	evm.TU.Chr1.2167	GGAGCAAGATATTGGGATGATGA	AGAAGAAGAAACCTGACCCTGTAGT
pel	evm.TU.Chr1.5324	ACAGGAAATGCTTTGGTGAGG	ATGGCTGGACCCGAAGATG
CXXS1	evm.TU.Chr4.275	TGGCTATGAACCCATTCTTTGA	ATCTCCAGTCGAGTCGCTACCT
PAMT1	evm.TU.Chr4.1683	TGCCGACTGTGACTGCTCTG	CACTTGCACTTTCCATCGTTCT
CASP-like	evm.TU.Chr5.1025	TCCATCGCAAAGGCTCAAA	CTGTTCCCATACTGCCCCAC
CII	evm.TU.Chr1.1775	GGGCTAAGTATGTCAGGATGGAG	TTGGCAAACAGCAGAAATGG
glutathione S-transferase F9-like	evm.TU.Chr3.1897	TGTTTGCCTCAGCATTGGG	TCAGCAAGGCTAAAGAAATCACC
cell wall / vacuolar inhibitor of fructosidase 1-like	evm.TU.Chr1.4862	CTTCCCAACAGACGCCAATC	GCTCCGAGGGTCCGATTTA
protein ROOT HAIR DEFECTIVE 3	evm.TU.Chr3.488	CCGCAATGGTGTTCTTCCC	CCCCTTCGTCTGCTAGTCTTTTA
